# Supplementary material for: General Synthesis of Ultrafine Metal Oxide/Reduced Graphene Oxide Nanocomposites for Ultrahigh-Flux Nanofiltration Membrane
Source: Research Square preprint supplement (doi:10.21203/rs.3.rs-844806/v1), 2021-09-03
Supplement: Supplementary file 2 [file 7953bf1f090e7a9012798147.docx]

**General Synthesis of Ultrafine Metal Oxide/Reduced Graphene Oxide Nanocomposites for Ultrahigh-Flux Nanofiltration Membrane**

*Wanyu Zhanga, Hai Xua, Fei Xiea, Xiaohua Maa, Bo Niua*, Mingqi Chena, Hongyu Zhanga, Yayun Zhanga, Donghui Longa **

aState Key Laboratory of Chemical Engineering, East China University of Science and Technology, Shanghai 200237, China

* Corresponding author:

E-mail: longdh@ mail.ecust.edu.cn (Donghui Long).

niubo@ecust.edu.cn (Bo Niu)

**Figures and Tables:**

**Fig. S1.** Zeta potentials of GO, Zn (Ac)2·2H2O and GO-Zn (Ac)2·2H2O mixture.

**Fig. S2**. Illustration of one ZnO cell (Zn white, O red; highlighted atoms are inside unit cell).

**Fig. S3.** TEM images of various samples.

**Fig. S4**. High-resolution C 1s XPS spectrum curves of ZnO/rGO.

**Fig. S5**. HR-TEM images of (a) ZnO/rGO-90℃, (b) ZnO/rGO-120℃, (c) ZnO/rGO-150℃, (d) ZnO/rGO-30%, (e) ZnO/rGO and (e) ZnO/rGO-70%.

**Fig. S6**. Graph of the average particle size and particle number density over temperature.

**Fig. S7.** Thermogravimetric analysis (TGA) curves of samples prepared (a) at various temperature and (b) by various precursor concentration.

**Fig. S8**. (a-b) TEM images, (c) XRD pattern, and SEM image of ZnO.

**Fig. S9**. (a) TEM images of ZnO/rGO-H2O.

**Fig. S10.** (a) TEM images of ZnO/rGO-EtOH.

**Fig. S11.** TEM images of various metal oxide/rGO nanocomposites at different magnifications.

**Fig. S12.** TEM images of various metal oxide/rGO nanocomposites at different magnifications.

**Fig. S13.** TEM images of various metal sulfide/rGO nanocomposites at different magnifications.

**Fig. S14.** (a) Cd 3d XPS pattern of CdO/rGO. (b) Co 2p XPS pattern of CoO/rGO. (c) Cu 2p XPS pattern of CuO/rGO. (d) Fe 2p XPS pattern of Fe2O3/rGO. (e) Mg 1s and (f) Mg 2p XPS patterns of MgO/rGO. (g) La 3d XPS pattern of La2O3/rGO. (h) Mo 3d XPS pattern of MoO3/rGO. (i) Nb 3d XPS pattern of Nb2O5/rGO.

**Fig. S15.** Thermogravimetric analysis (TGA) curves of CdO/rGO, CoO/rGO, CuO/rGO, Fe2O3/rGO, La2O3/rGO, MgO/rGO, MoO3/rGO, ZnO/rGO and Nb2O5/rGO under air atmosphere.

**Fig. S16.** (a) Digital photograph, (b) top-view SEM image and (c) cross-section SEM image of ZnO/rGO/nylon membranes.

**Fig. S17.** Contact angle of water on (a) GO/Nylon and (b) ZnO/rGO/Nylon.

**Fig. S18.** SEM images of (a-e) ZnO/rGO and (f) GO membranes.

**Table S1.** Adsorption Energy of Zn2+ on functional groups

**Table S2.** Gibbs free energy of various reaction on GO surface functional groups.

**Table S3.** Metal oxide contents of various composites.

**Table S4**. Chemical structures and sizes of five dye molecules used in this work.

**Table S5.** Nanofiltration performance comparation of GO-based membranes.


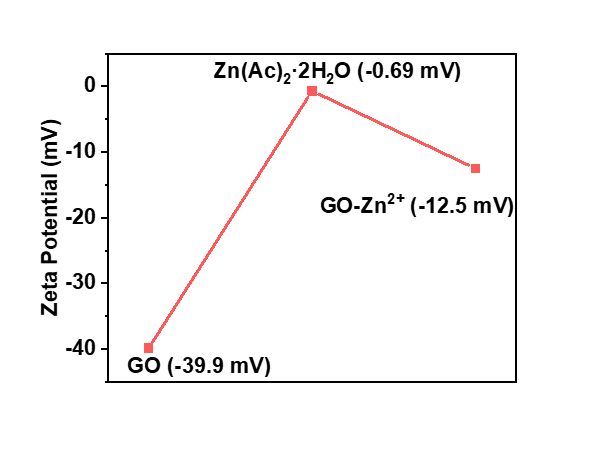


**Fig. S1**. Zeta potentials of GO, Zn (Ac)2·2H2O and GO-Zn (Ac)2·2H2O mixture.

Additional Analysis: As manifested in **Fig. S1**, the surface of graphene oxide (GO) is negatively charged (zeta potential=-40 mV), which originated from the oxygen functional groups located on nanosheets. After mixing GO and neutral Zn(Ac)2·2H2O (zeta potential=-0.69 mV) in ethylene glycol (EG) solution, the zeta potential shows a positive switch (-12.5 mV), suggesting the adsorption of [Zn(EG)2]2+ on GO surface.


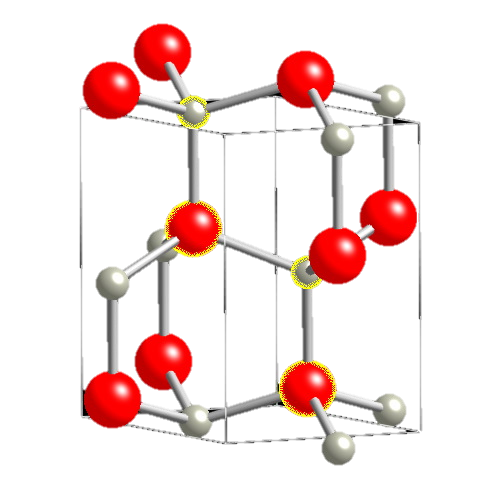


**Fig. S2**. Illustration of one ZnO cell (Zn white, O red; highlighted atoms are inside unit cell).

Additional analysis: The unit cell volume is approximately 47.6 Å3. Consequently, ZnO contains approximately 8.4×1022 atoms per cm3. The synthetically produced ZnO with the wurtzite structure may eventually exhibit a crystallographic arrangement different from the pattern established in the crystallographic records[1].


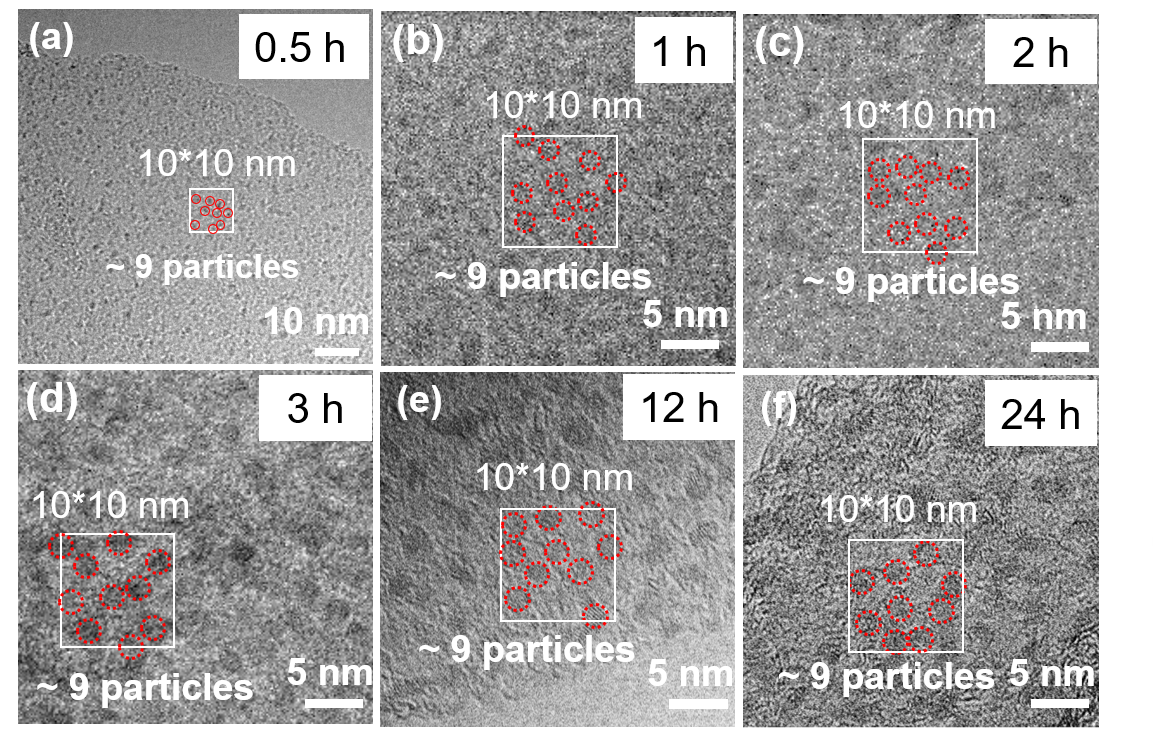


**Fig. S3.** TEM images of various samples synthesized at different time.

Additional analysis: The particle number density is almost the same of 9 per 10 nm×10 nm for all samples synthesized at different time, indicating that the nucleation occurs simultaneously at GO surface and no new nuclei form during growth process.


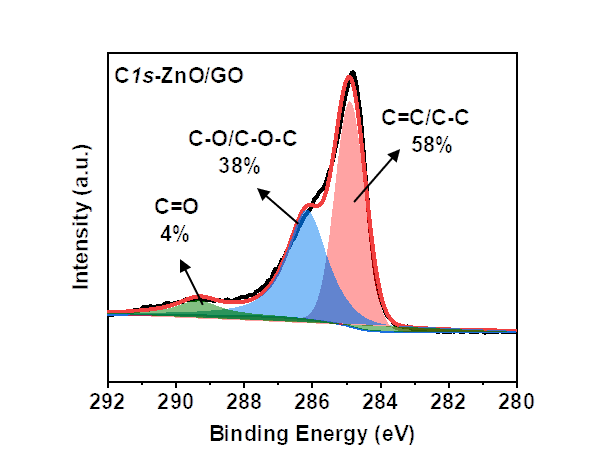


**Fig. S4**. High-resolution C 1s XPS spectrum curves of ZnO/rGO.


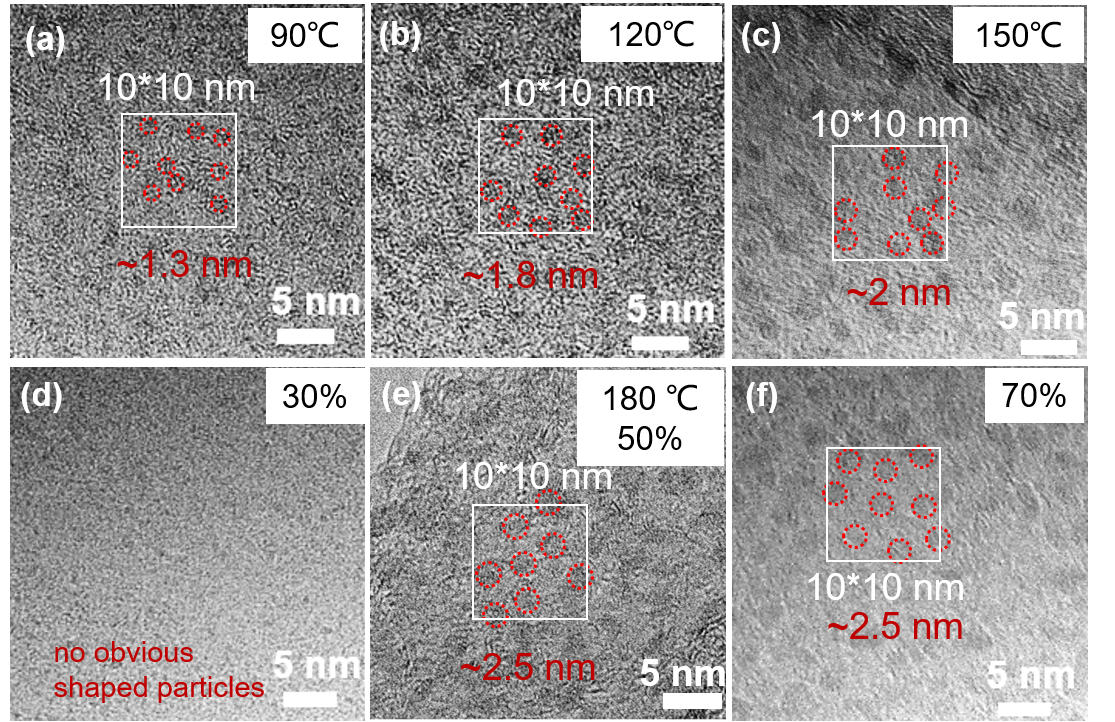


**Fig. S5**. HR-TEM images of (a) ZnO/rGO-90℃, (b) ZnO/rGO-120℃, (c) ZnO/rGO-150℃, (d) ZnO/rGO-30%, (e) ZnO/rGO and (e) ZnO/rGO-70%.

Additional Analysis: The samples synthesized at different temperature or with different precursor concentration show the same particle number density of 9 nanoparticles per 10 nm×10 nm.


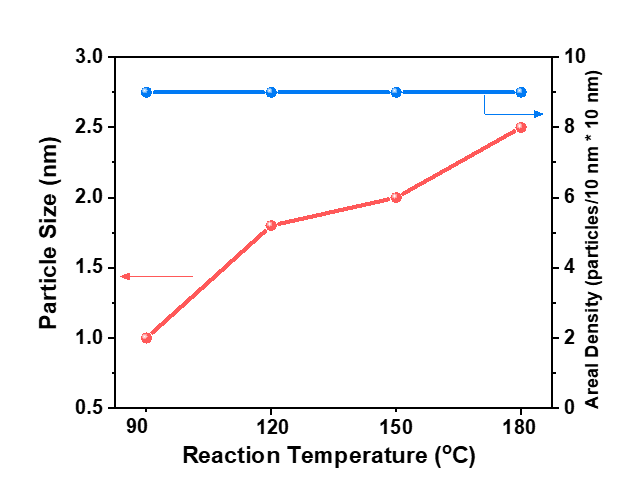


**Fig. S6**. Graph of the average particle size and particle number density over temperature.

**
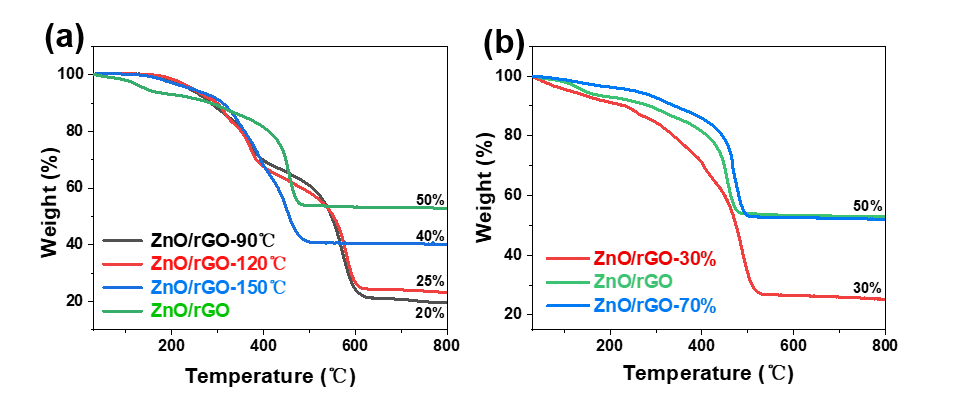
**

**Fig. S7.** Thermogravimetric analysis (TGA) curves of samples prepared (a) at various temperature and (b) by various precursor concentration.


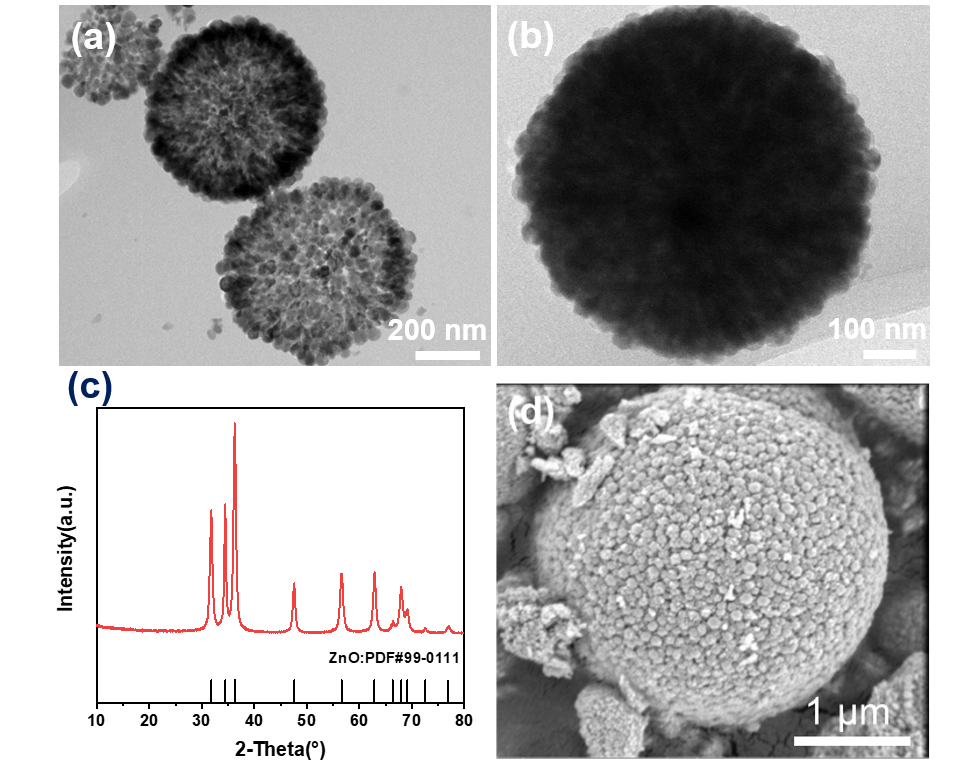


**Fig. S8**. (a-b) TEM images, (c) XRD pattern, and SEM image of ZnO.


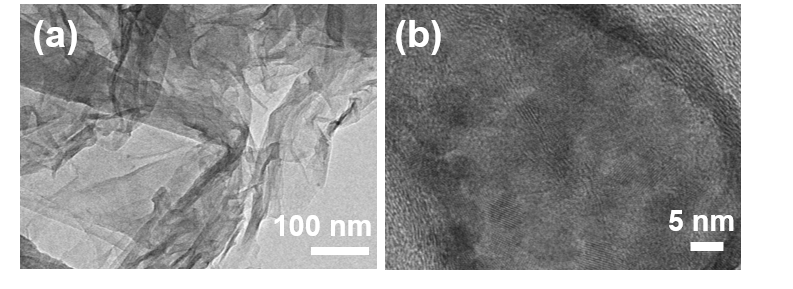


**Fig. S9**. (a) TEM images of ZnO/rGO-H2O.

Additional Analysis: The sample ZnO/rGO-H2O was synthesized using the same process as that of ultrafine ZnO/rGO nanocomposites, except that the solvent EG was changed to deionized water.


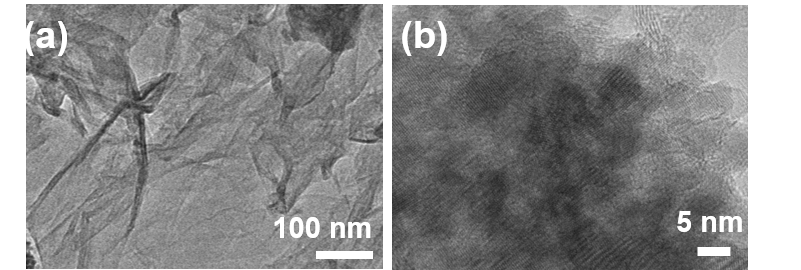


**Fig. S10.** (a) TEM images of ZnO/rGO-EtOH.

Additional Analysis: The sample ZnO/rGO-EtOH was synthesized using the same process as that of ultrafine ZnO/rGO nanocomposites, except that the solvent EG was changed to EtOH.


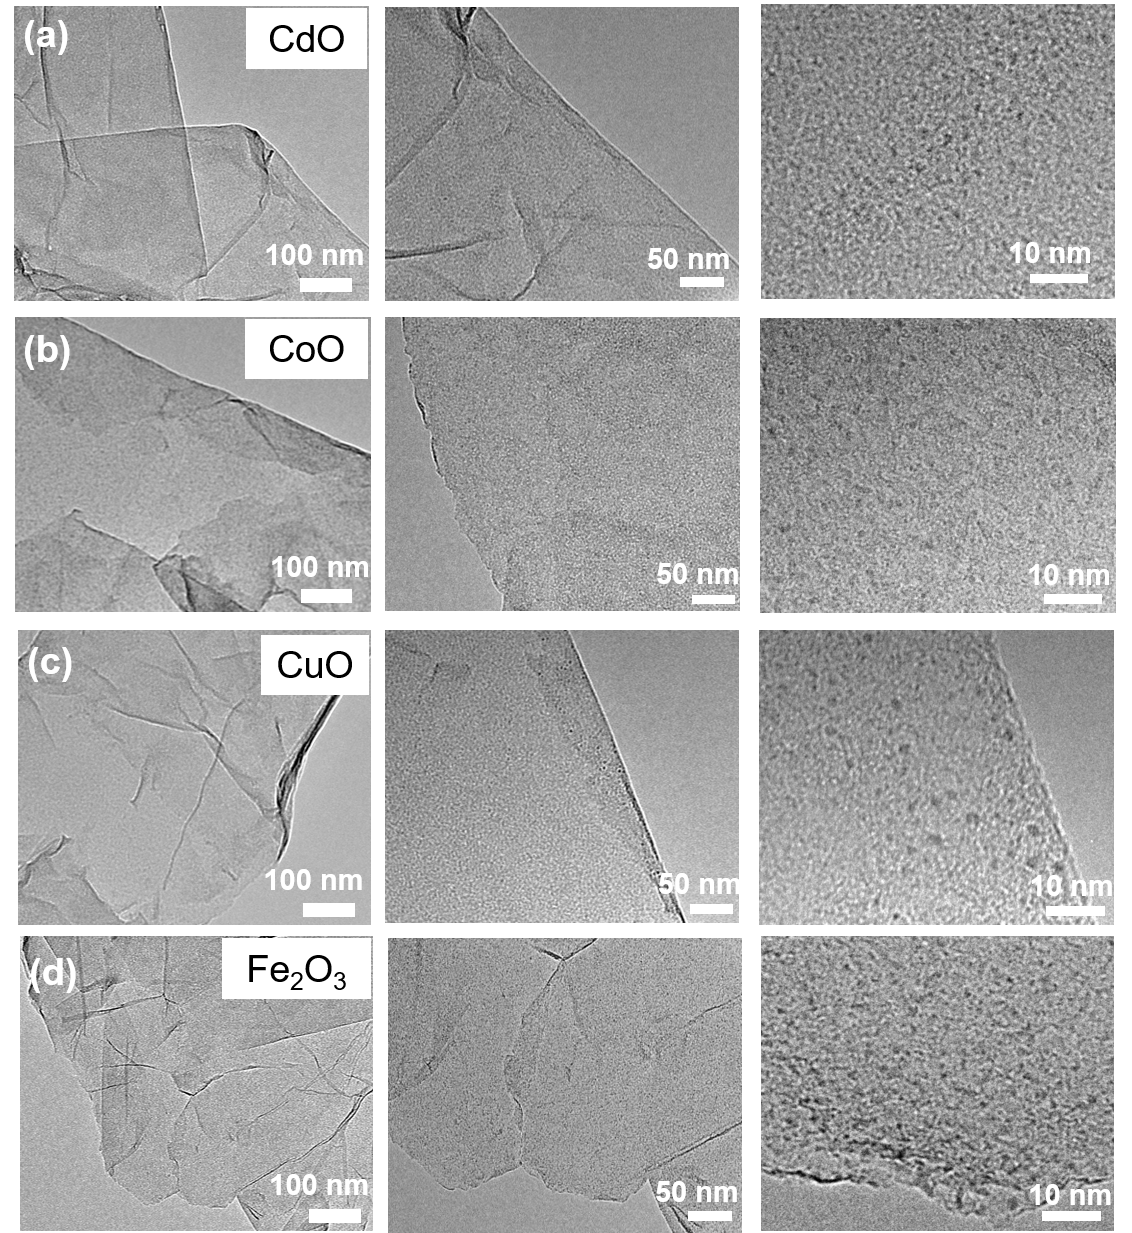


**Fig. S11.** TEM images of (a) CdO/rGO, (b) CoO/rGO, (c) CuO/rGO, (d) Fe2O3/rGO nanocomposites at different magnifications.


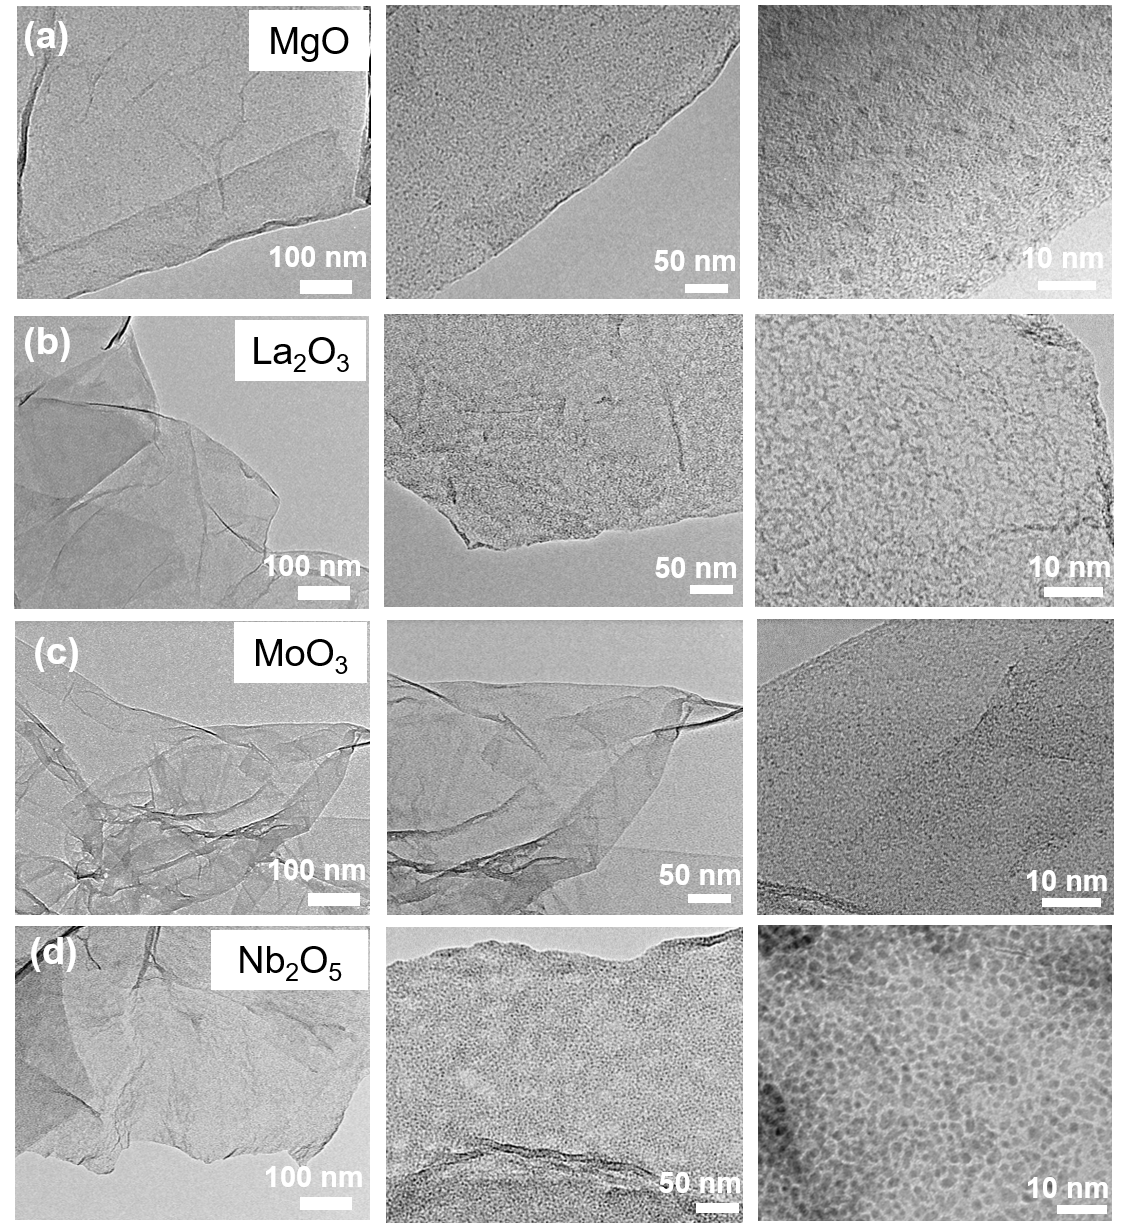


**Fig. S12.** TEM images of (a) MgO/rGO, (b) La2O3/rGO, (c) MoO3/rGO, (d) Nb2O5/rGO nanocomposites at different magnifications.


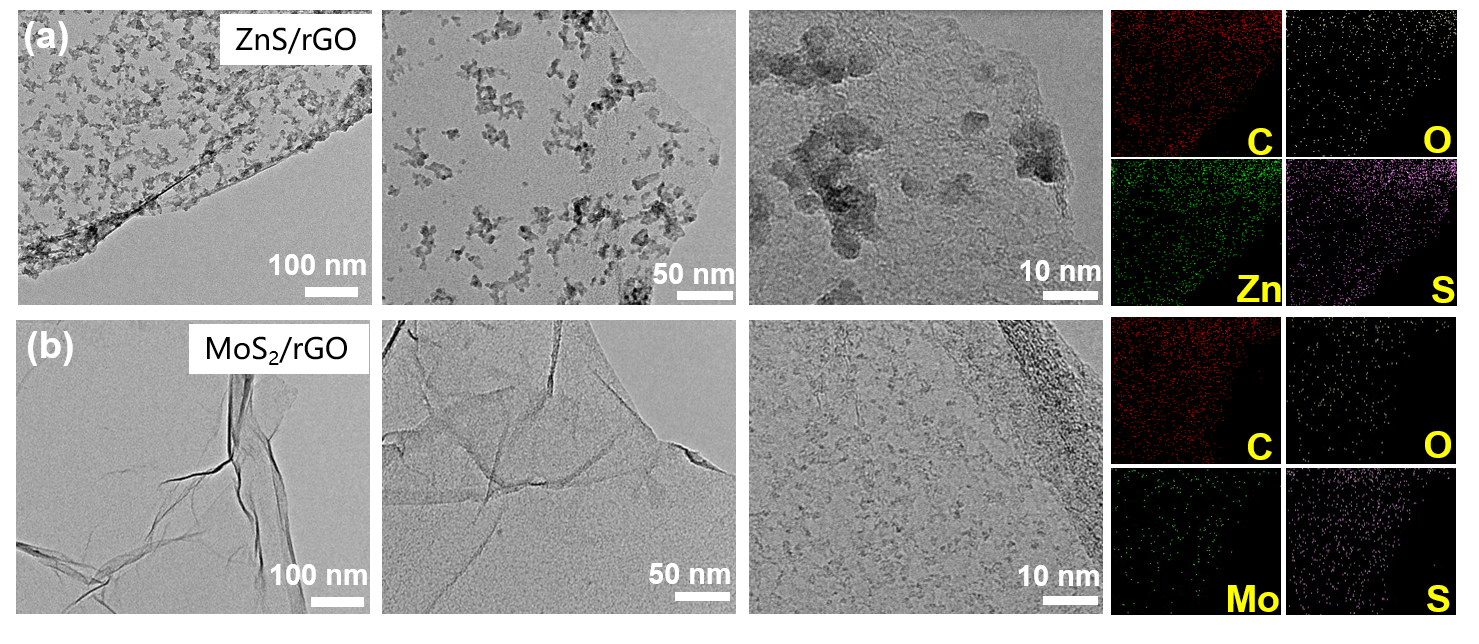
**Fig. S13.** TEM images of (a) ZnS/rGO and (b) MoS2/rGO nanocomposites at different magnifications.


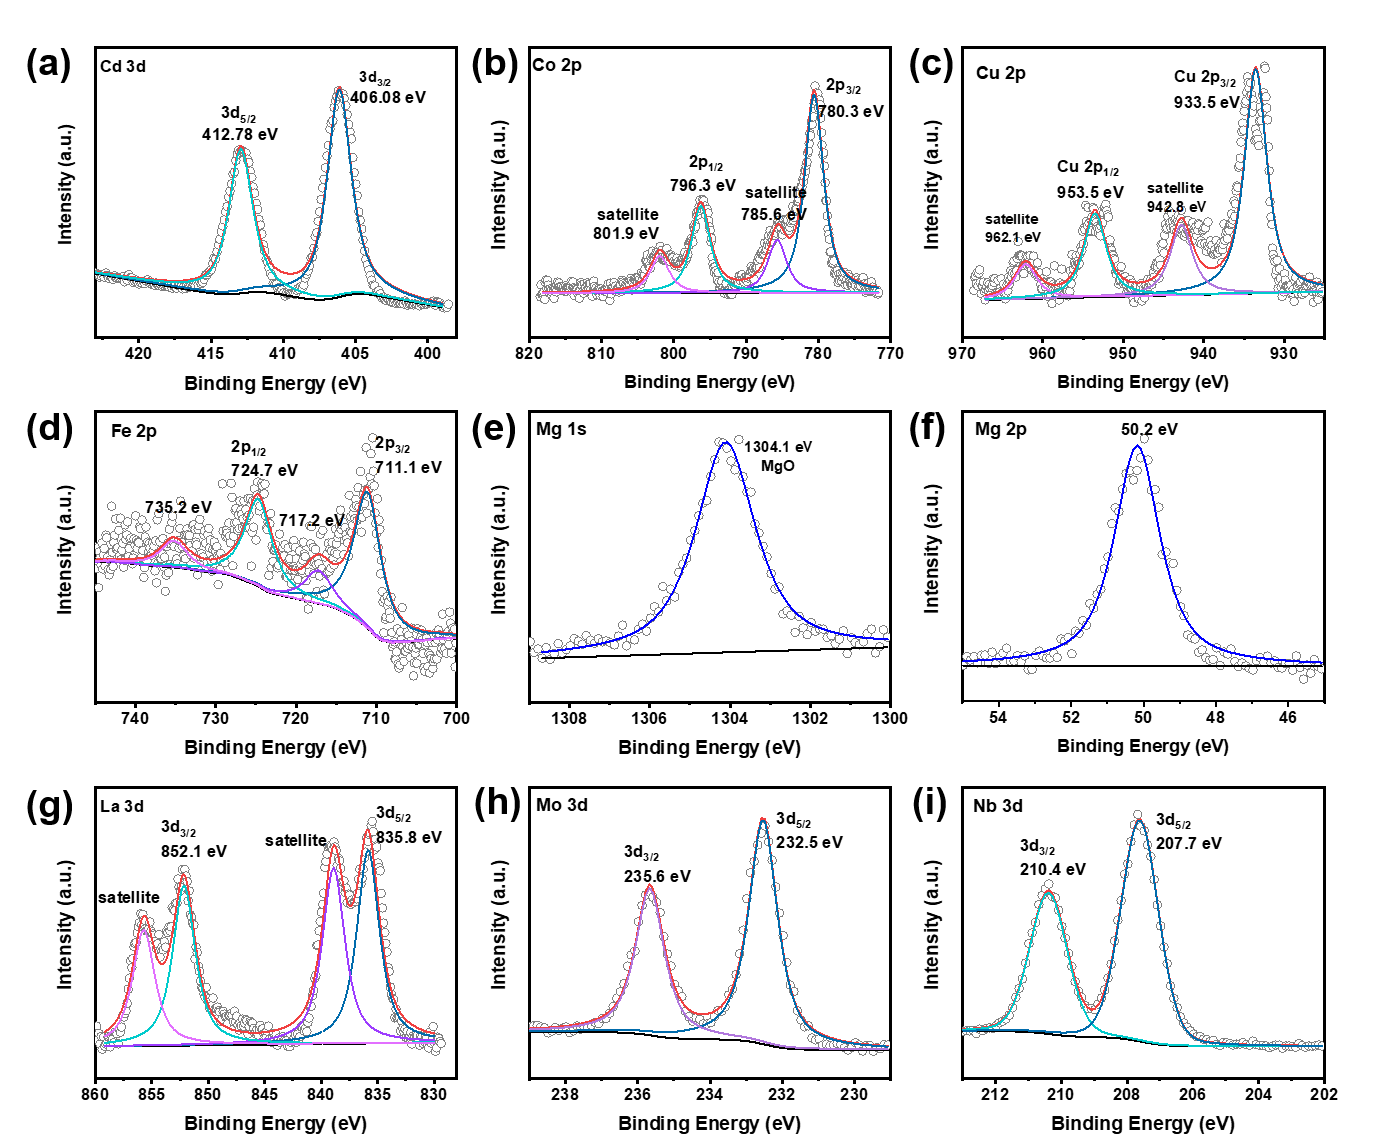


**Fig. S14.** (a) Cd 3d XPS pattern of CdO/rGO[2]. (b) Co 2p XPS pattern of CoO/rGO[3]. (c) Cu 2p XPS pattern of CuO/rGO[4]. (d) Fe 2p XPS pattern of Fe2O3/rGO[5]. (e) Mg 1s and (f) Mg 2p XPS patterns of MgO/rGO[6]. (g) La 3d XPS pattern of La2O3/rGO[7]. (h) Mo 3d XPS pattern of MoO3/rGO[8]. (i) Nb 3d XPS pattern of Nb2O5/rGO[9].

Additional Analysis: The chemical compositions of metal oxide in nanocomposites were confirmed by XPS according to references.


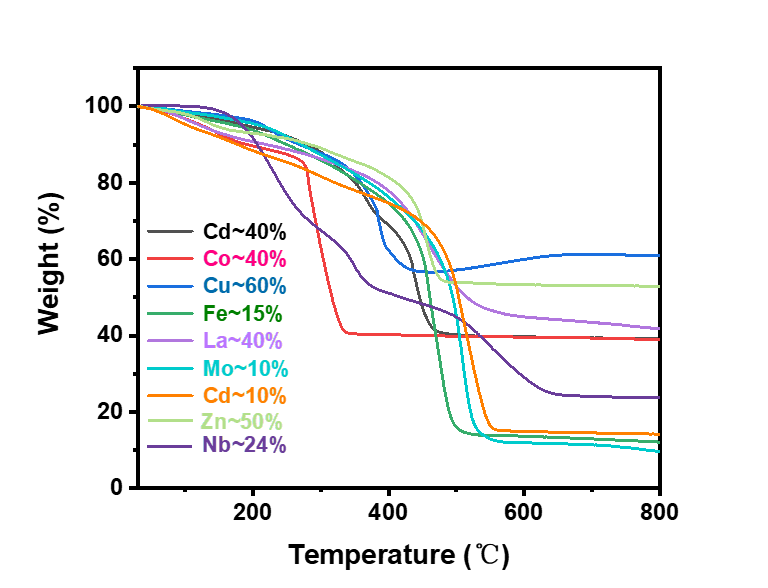


**Fig. S15.** Thermogravimetric analysis (TGA) curves of CdO/rGO, CoO/rGO, CuO/rGO, Fe2O3/rGO, La2O3/rGO, MgO/rGO, MoO3/rGO, ZnO/rGO and Nb2O5/rGO under air atmosphere.


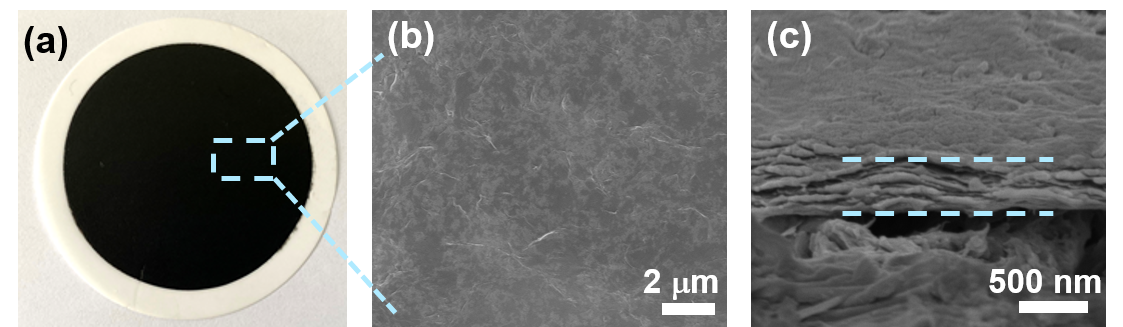


**Fig. S16.** (a) Digital photograph, (b) top-view SEM image and (c) cross-section SEM image of ZnO/rGO/nylon membranes.


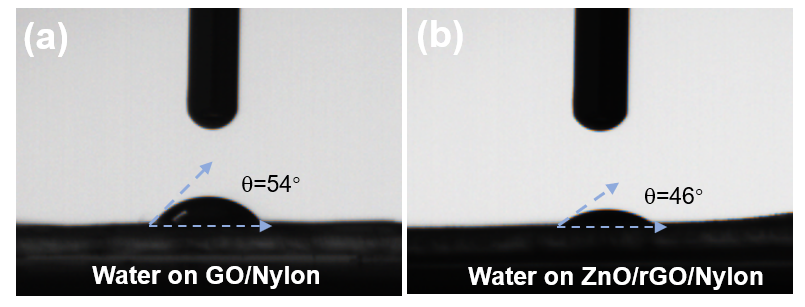


**Fig. S17.** Contact angle of water on (a) GO/Nylon and (b) ZnO/rGO/Nylon.


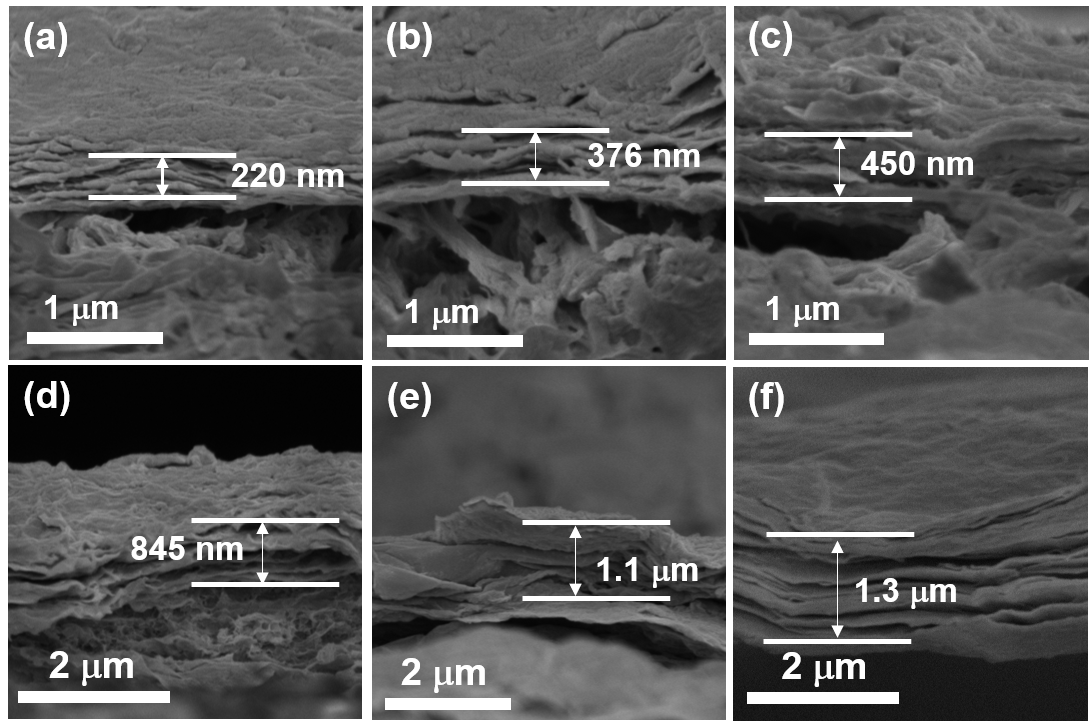


**Fig. S18.** SEM images of (a) 0.14 mg cm-2, (b) 0.27 mg cm-2, (c) 0.41 mg cm-2, (d) 0.54 mg cm-2, and (e) 0.68 mg cm-2 ZnO/rGO loading amount on nylon membranes. (f) 0.54 mg cm-2 loading amount of GO on nylon membrane.

Additional Analysis: From cross-section SEM image (Fig. S18), GO membrane presents a uniform laminar structure, while the layers in ZnO/rGO membranes were wrinkled with larger interlayer spacing.

**Table S1.** Gibbs free energy of various reaction on GO surface functional groups.

| Functional groups | ΔG (I) /eV | ΔG (II) /eV | ΔG (III) /eV | ΔGtotal /eV |
| --- | --- | --- | --- | --- |
| -OH | -0.349 | -7.376 | 1.292 | -6.433 |
| -COC | -1.089 | -6.868 | 0.958 | -6.999 |
| -COOH | -1.036 | -7.282 | 1.710 | -6.6.08 |
| -CO | -1.072 | -6.733 | 0.046 | -7.759 |
| without GO |  | -0.678 | -6.412 | 1.539 |

*ΔG (I): Gibbs free energy of reaction adsorption of Zn2+ onto GO surface;

ΔG (II): Gibbs free energy of reaction Zn2+*→Zn(OH)2*;

ΔG (III): Gibbs free energy of reaction Zn(OH)2*→ZnO*;

ΔGtotal: Gibbs free energy of the whole reaction.

**Table S2.** Nanofiltration performance comparation of GO-based membranes.

| Membranes | Loading mass  (mg cm-2) | Thickness  (μm) | Pressure  (bar) | MB Rejection (%) | Water Permeance  (L m-2 h-1 bar-1) | Ref |
| --- | --- | --- | --- | --- | --- | --- |
| GO | 0.54 | 1.4 | 1 | 98.2 | 20 | This work |
| ZnO/rGO | 0.54 | 0.845 | 1 | 98.1 | 225 | This work |
| PEI-GO/PAA/PVA/GA |  |  | 5 | 99.3 | 0.87 | [10] |
| PDDA/GO |  | 0.01 | 5 | 99.2 | 6.42 | [11] |
| PAN/GO |  |  | 6 | 100 | 5.5 | [12] |
| GO/OCNTs |  |  | 3 | 99.3 | 7.24 | [13] |
| ZIF-8@GO |  | 0.105 | 1 | 100 | 49.81 | [14] |
| GO/g-C3N4 | 0.0247 |  | 1 | 100 | 76.6 | [15] |
| C-BCGO-Au-stc-M |  | 4 | 5 | 24.4 | 32.4 | [16] |
| GO/COF |  | 2.7 | 1 | 99.53 | 58.58 | [17] |
| DES/GO | 0.0035 |  | 3 | 96.7 | 21 | [18] |
| PVDF/SDS-GO/TiO2 |  | 18.6 | 2 | 92.79 | 4.63 | [19] |

**Table S3**. Chemical structures and sizes of five dye molecules used in this work[20].

| Organic dye | Molecular weight  (g mol-1) | Molecular size  (nm*nm) | Chemical structure |
| --- | --- | --- | --- |
| Methyl Orange (MO) | 327 | 1.13*0.42 | 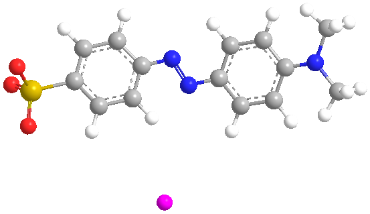 |
| Eriochrome Black T  (EBT) | 461 | 1.55*0.88 | 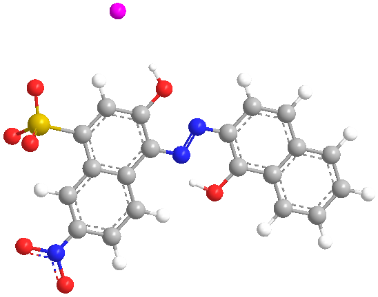 |
| Congo Red (CR) | 696 | 2.56*0.73 | 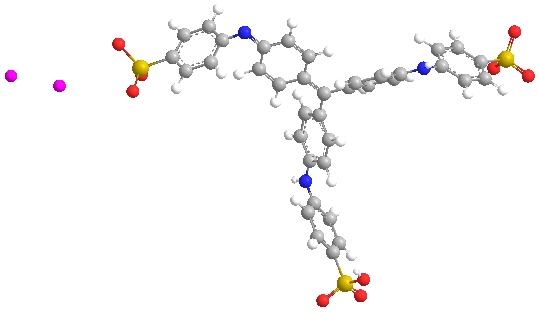 |
| Methyl Blue (MB) | 799.8 | 2.36*1.74 | 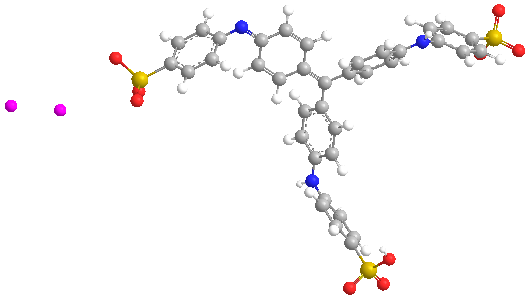 |
| Evans Blue (EB) | 960 | 3.1*1.3 | 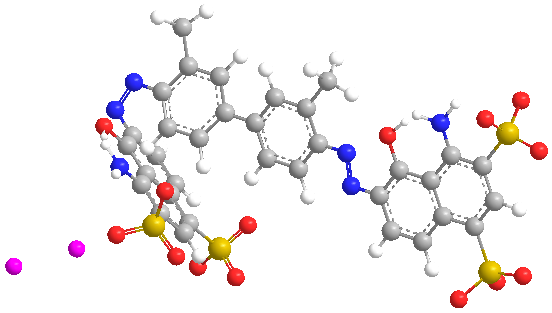 |

* C: grey balls; H: white balls; S: yellow balls; O: red balls; N: blue balls. The molecular sizes were calculated using ChemOffice2014.

**Reference**

1. CrystalMaker. *Structure Type 014: ZnO (wurtzite)*. Available from: <http://som.web.cmu.edu/structures/S014-ZnO.html>.

2. Saravanan, R., et al., *ZnO/Ag/CdO nanocomposite for visible light-induced photocatalytic degradation of industrial textile effluents.* J Colloid Interface Sci, 2015. **452**: p. 126-133.

3. Chang, L., et al., *Hierarchical CoO microflower film with excellent electrochemical lithium/sodium storage performance.* J. Mater. Chem. A, 2017. **5**(39): p. 20892-20902.

4. Sun, L., et al., *Nitrogen‐Doped Carbon‐Coated CuO‐In2O3 p–n Heterojunction for Remarkable Photocatalytic Hydrogen Evolution.* Advanced Energy Materials, 2019. **9**(48).

5. Wang, Q. and Y. Wang, *Overcoming the Limiting Step of Fe2O3 Reduction via in Situ Sulfide Modification.* ACS Appl Mater Interfaces, 2016. **8**(16): p. 10334-42.

6. Ding, G., et al., *Waste to Wealth: Exhausted Nitrogen-Doped Mesoporous Carbon/MgO Desulfurizers Turned to High-Sulfur-Loading Composite Cathodes for Li-S Batteries.* ACS Appl Mater Interfaces, 2019. **11**(21): p. 19096-19103.

7. Cheng, Z., et al., *La2O3 modified silica-pillared clays supported PtOx nanocrystalline catalysts for catalytic combustion of benzene.* Chemical Engineering Journal, 2020. **392**.

8. Kawase, M., et al., *Elucidation of the enhanced photoactivity of melon calcined with MoO3.* Applied Catalysis B: Environmental, 2020. **273**.

9. Huang, Q., et al., *Rational cooperativity of nanospace confinement and rapid catalysis via hollow carbon nanospheres@ Nb-based inorganics for high-rate Li-S batteries.* Chemical Engineering Journal, 2021. **411**: p. 128504.

10. Wang, N., et al., *Self-assembly of graphene oxide and polyelectrolyte complex nanohybrid membranes for nanofiltration and pervaporation.* Chemical Engineering Journal, 2012. **213**: p. 318-329.

11. Wang, L., et al., *Layer-by-layer self-assembly of polycation/GO nanofiltration membrane with enhanced stability and fouling resistance.* Separation and Purification Technology, 2016. **160**: p. 123-131.

12. Qiu, Z., X. Ji, and C. He, *Fabrication of a loose nanofiltration candidate from Polyacrylonitrile/Graphene oxide hybrid membrane via thermally induced phase separation.* J Hazard Mater, 2018. **360**: p. 122-131.

13. Kang, H., et al., *Sandwich morphology and superior dye-removal performances for nanofiltration membranes self-assemblied via graphene oxide and carbon nanotubes.* Applied Surface Science, 2018. **428**: p. 990-999.

14. Zhang, W.H., et al., *Graphene oxide membranes with stable porous structure for ultrafast water transport.* Nat Nanotechnol, 2021. **16**(3): p. 337-343.

15. Wu, Y., et al., *2D Heterostructured Nanofluidic Channels for Enhanced Desalination Performance of Graphene Oxide Membranes.* ACS Nano, 2021. **15**(4): p. 7586-7595.

16. Zhong, Y., et al., *Graphene oxide modified membrane for highly efficient wastewater treatment by dynamic combination of nanofiltration and catalysis.* J Hazard Mater, 2020. **397**: p. 122774.

17. Chen, L., et al., *High performance hierarchically nanostructured graphene oxide/covalent organic framework hybrid membranes for stable organic solvent nanofiltration.* Applied Materials Today, 2020. **20**.

18. Mehrabi, N., H. Lin, and N. Aich, *Deep eutectic solvent functionalized graphene oxide nanofiltration membranes with superior water permeance and dye desalination performance.* Chemical Engineering Journal, 2021. **412**.

19. Suriani, A.B., et al., *Incorporation of Electrochemically Exfoliated Graphene Oxide and TiO2 into Polyvinylidene Fluoride-Based Nanofiltration Membrane for Dye Rejection.* Water, Air, & Soil Pollution, 2019. **230**(8).

20. Fan, H., et al., *High‐flux membranes based on the covalent organic framework COF‐LZU1 for selective dye separation by nanofiltration.* Angewandte Chemie International Edition, 2018. **57**(15): p. 4083-4087.
